# Supplementary material
Source: PubMed Central journal article supplement (PMC4472496)
Supplement: NIHMS689109-supplement-1.pdf [file NIHMS689109-supplement-1.pdf]

## **Supplemental Information**

### **Dietary protein to carbohydrate ratio and caloric restriction: comparing metabolic outcomes in mice**

Samantha M. Solon-Biet, Sarah J. Mitchell, Sean C. P. Coogan, Victoria C. Cogger, Rahul Gokarn, Aisling C. McMahon, David Raubenheimer, Rafael de Cabo, Stephen J. Simpson, David G. Le Couteur

## Supplemental Figures

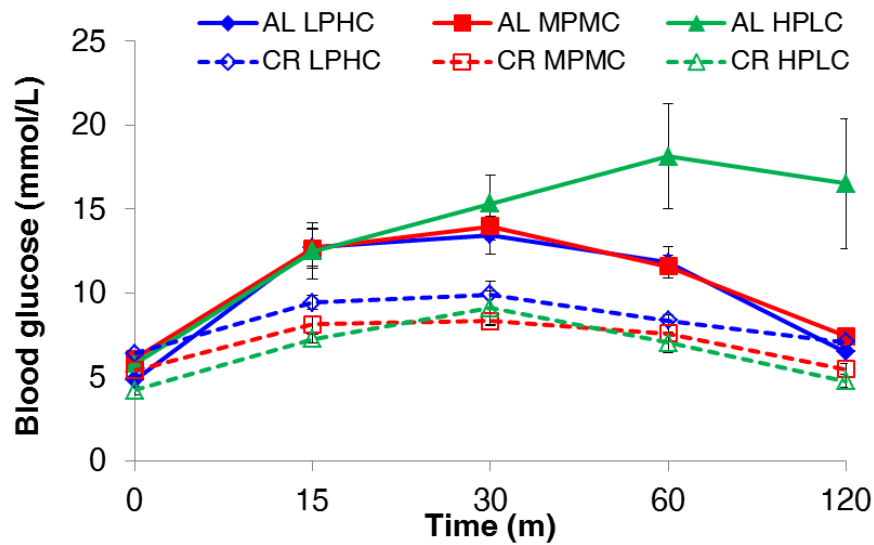

**Figure S1, related to Figure 2 and Table S3  $\pm$  SEM.** Glucose tolerance test results showing changing blood glucose levels over time and analysed using repeated measures ANOVA. (AL *ad libitum*; CR caloric restricted; HPLC high ratio of protein to carbohydrate; MPMC medium protein to carbohydrate ratio; LPHC low protein to carbohydrate ratio). See also Table S3.

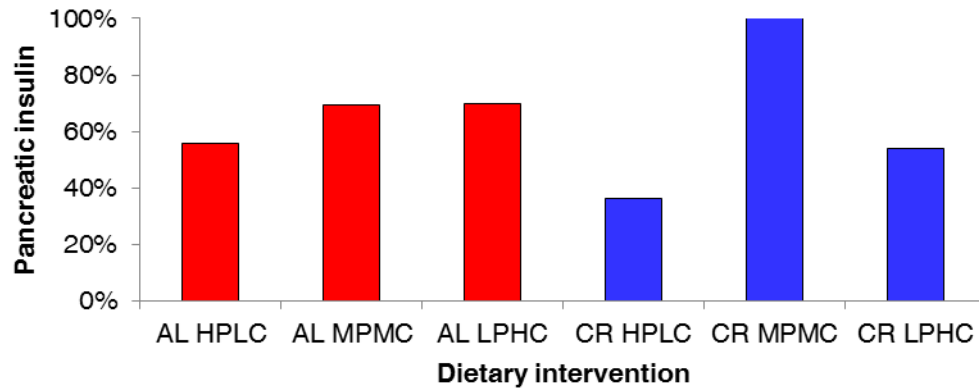

**Figure S2, related to Figure 3.** Pancreatic insulin staining. The effect of diet on pancreatic  $\beta$ -cell staining. Percentages indicate the proportion of samples with high intensity staining. (AL *ad libitum*; CR caloric restricted; HPLC high ratio of protein to carbohydrate; MPMC medium protein to carbohydrate ratio; LPHC low protein to carbohydrate ratio).

## Supplemental Tables

**Table S1, related to experimental procedures.** Experimental diets. Ingredients of low (P5%, LPHC), medium (P33%, MPMC), and high (P60%, HPLC) protein to carbohydrate diets fed to mice on both a mass (*g/kg*) and energy (*kcal/kg*) basis.

|                        | LPHC<br>P5% |         | MPMC<br>P33% |         | HPLC<br>P60% |         |
|------------------------|-------------|---------|--------------|---------|--------------|---------|
|                        | g/kg        | Kcal/kg | g/kg         | Kcal/kg | g/kg         | Kcal/kg |
| Casein                 | 54.68       | 195.75  | 356.43       | 1276.02 | 654.28       | 2342.32 |
| Methionine             | 0.80        | 3.20    | 5.30         | 21.20   | 9.80         | 39.20   |
| Sucrose                | 66.27       | 265.08  | 65.47        | 261.88  | 66.07        | 264.28  |
| Cornstarch             | 649.82      | 2339.36 | 317.68       | 1143.70 | 42.14        | 151.71  |
| Dextrinised cornstarch | 99.46       | 377.95  | 98.05        | 372.59  | 99.05        | 376.39  |
| Soya bean oil          | 88.37       | 795.33  | 87.26        | 785.34  | 88.06        | 792.54  |

**Table S2, related to Figures 1-4.** Statistical results. Comparison of each outcome was performed first by ANOVA. If ANOVA was significant, a post hoc Fisher LSD test was performed. (AL *ad libitum*, CR caloric restricted, HPLC high protein to carbohydrate, MPMC medium protein to carbohydrate, LPHC low protein to carbohydrate). Of particular note is that the AL LPHC did not have any differences with the CR diets for insulin, HOMA, triglycerides (Trig) and HDLc, but was different in terms of RER, energy expenditure (EE), body weight and body fat (shaded area). AUC indicates the area under the curve for glucose tolerance tests. P-values for significant comparisons are shown.

|                      | <b>Body mass</b> | <b>Insulin</b> | <b>HOMA</b> | <b>Trig</b> | <b>HDLc</b> | <b>RER</b> | <b>EE</b> | <b>% Body fat</b> | <b>AUC</b> |
|----------------------|------------------|----------------|-------------|-------------|-------------|------------|-----------|-------------------|------------|
| <i>ANOVA P-value</i> | <0.001           | <0.001         | <0.001      | <0.001      | 0.010       | <0.001     | <0.001    | <0.001            | <0.001     |
| AL LPHC vs CR HPLC   | <0.001           |                |             |             |             | <0.001     | <0.001    | 0.027             | 0.041      |
| AL LPHC vs CR MPMC   | 0.004            |                |             |             |             | <0.001     | <0.001    | 0.001             | 0.012      |
| AL LPHC vs CR LPHC   | 0.005            |                |             |             |             | <0.001     | <0.001    | 0.002             | 0.014      |
| AL HPLC vs CR HPLC   | <0.001           | <0.001         | <0.001      | <0.001      |             | <0.001     | <0.001    |                   | <0.001     |
| AL HPLC vs CR MPMC   | <0.001           | <0.001         | <0.001      | <0.001      |             | <0.001     | <0.001    | 0.011             | <0.001     |
| AL HPLC vs CR LPHC   | <0.001           | <0.001         | <0.001      | <0.001      |             | <0.001     |           | 0.017             | <0.001     |
| AL HPLC vs AL MPMC   | 0.048            |                |             | <0.001      | 0.001       | 0.010      | <0.001    |                   | <0.001     |
| AL HPLC vs AL LPHC   |                  | <0.001         | <0.001      | <0.001      | <0.001      | <0.001     | <0.001    |                   | 0.005      |
| AL MPMC vs CR HPLC   | <0.001           | <0.001         | <0.001      | 0.025       |             | <0.001     |           | 0.005             |            |
| AL MPMC vs CR MPMC   | <0.001           | <0.001         | <0.001      | 0.003       |             | <0.001     |           | <0.001            |            |
| AL MPMC vs CR LPHC   | <0.001           | <0.001         | <0.001      | <0.001      |             | <0.001     | <0.001    | <0.001            |            |
| AL MPMC vs AL LPHC   | <0.001           | <0.001         | 0.004       | <0.001      |             | <0.001     | <0.001    |                   |            |
| CR HPLC vs CR MPMC   |                  |                |             |             |             |            |           |                   |            |
| CR HPLC vs CR LPHC   |                  |                |             |             |             |            | <0.001    |                   |            |
| CR MPMC vs CR LPHC   |                  |                |             |             |             |            | <0.001    |                   |            |

**Table S3, related to Figures 2 and Figure S1. Repeated measures analysis for glucose tolerance tests.** (AL *ad libitum*, CR caloric restricted, HPLC high protein to carbohydrate, MPMC medium protein to carbohydrate, LPHC low protein to carbohydrate). Basal blood glucose levels did not differ between groups. The AL HPLC group (shaded area) showed rising blood glucose levels over time and were the only group that did not return to basal levels at 120 m. P-values for significant comparisons are shown.

| <i>ANOVA P-value<br/>Diet x Time</i> | <0.001*  |           |           |           |            |
|--------------------------------------|----------|-----------|-----------|-----------|------------|
| <b>Time (m)</b>                      | <b>0</b> | <b>15</b> | <b>30</b> | <b>60</b> | <b>120</b> |
| AL HPLC vs<br>CR HPLC                |          | 0.025     | 0.004     | <0.001    | <0.001     |
| AL HPLC vs<br>CR MPMC                |          |           | 0.001     | <0.001    | <0.001     |
| AL HPLC vs<br>CR LPHC                |          |           | 0.028     | <0.001    | <0.001     |
| AL HPLC vs<br>AL MPMC                |          |           |           | 0.002     | <0.001     |
| AL HPLC vs<br>AL LPHC                |          |           |           | 0.003     | <0.001     |
| AL HPLC vs<br>CR HPLC                |          | 0.025     | 0.004     | <0.001    | <0.001     |
| AL LPHC vs<br>CR HPLC                |          | 0.020     |           |           |            |
| AL LPHC vs<br>CR MPMC                |          |           | 0.040     |           |            |
| AL LPHC vs<br>CR LPHC                |          |           |           |           |            |
| AL MPMC vs<br>CR HPLC                |          | 0.020     | 0.042     |           |            |
| AL MPMC vs<br>CR MPMC                |          |           | 0.018     |           |            |
| AL MPMC vs<br>CR LPHC                |          |           |           |           |            |
| AL MPMC vs<br>AL LPHC                |          |           |           |           |            |
| CR HPLC vs<br>CR MPMC                |          |           |           |           |            |
| CR HPLC vs<br>CR LPHC                |          |           |           |           |            |
| CR MPMC vs<br>CR LPHC                |          |           |           |           |            |
